# Supplementary material for: The impact of software-based metal artifact reduction on the liquid embolic agent Onyx in cone-beam CT: a systematic in vitro and in vivo study
Source: HighWire-hosted journal article supplement (doi:10.1136/neurintsurg-2021-018018), 2021-08-25
Supplement: neurintsurg-2021-018018supp001_data_supplement.pdf [file neurintsurg-2021-018018supp001_data_supplement.pdf]

### Supplementary Appendix

#### Supplementary Table

Detailed description of the 20 patients which were treated by endovascular embolization and were eligible for the present study.

| Patient | Type of vascular malformation | Location           | Ruptured | Onyx 18 | Cyanoacrylates mixed with iodized oil <sup>1</sup> | <sup>1</sup> ratio |
|---------|-------------------------------|--------------------|----------|---------|----------------------------------------------------|--------------------|
| 1       | dAVF                          | Transverse Sinus L | No       | x       |                                                    |                    |
| 2       | AMV                           | Occipital lobe L   | No       | x       | x                                                  | 1:1,5 / 1:2        |
| 3       | dAVF                          | Sigmoid sinus R    | No       | x       |                                                    |                    |
| 4       | dAVF                          | Sigmoid sinus R    | No       | x       |                                                    |                    |
| 5       | AVM                           | Cerebellum         | Yes      | x       |                                                    |                    |
| 6       | AVM                           | Occipital lobe L   | No       | x       |                                                    |                    |
| 7       | dAVF                          | Transverse sinus L | No       | x       |                                                    |                    |
| 8       | dAVF                          | Transverse sinus L | No       | x       | x                                                  | 1:2                |
| 9       | dAVF                          | Transverse sinus L | No       | x       |                                                    |                    |
| 10      | AVM                           | Temporal lobe L    | No       | x       |                                                    |                    |
| 11      | AVM                           | Occipital lobe L   | No       | x       |                                                    |                    |
| 12      | AVM                           | Occipital lobe L   | No       | x       | x                                                  | 1:2                |
| 13      | AVM                           | Occipital lobe L   | No       | x       |                                                    |                    |
| 14      | AVM                           | Cerebellum         | No       | x       | x                                                  | 1:2                |
| 15      | dAVF                          | Sigmoid sinus L    | No       | x       |                                                    |                    |
| 16      | AVM                           | Occipital lobe L   | No       | x       | x                                                  | 1:4                |
| 17      | AVM                           | Parietal lobe L    | No       | x       | x                                                  | 1:2 / 1:3 / 1:4    |
| 18      | AVM                           | Occipital lobe L   | No       | x       | x                                                  | 1:2                |

|           |     |                |     |   |   |     |
|-----------|-----|----------------|-----|---|---|-----|
| <b>19</b> | AVM | Frontal lobe L | No  | x | x | 1:3 |
| <b>20</b> | AVM | Cerebellum     | Yes | x |   |     |

All 20 patients with AVM or dAVF were treated by endovascular embolization with Onyx 18. While 12 patients of the collective were treated solely with Onyx 18, for 8 of them further embolization with cyanoacrylates mixed with iodized oil of different ratios was performed. The total volume of each agent used for endovascular embolization was not provided in the corresponding reports.

dAVF: dural arteriovenous fistula; AVM: arteriovenous malformation; L: left; R: right.
